# Supplementary material for: Detecting evolution of bioinformatics with a content and co-authorship analysis
Source: PubMed Central journal article supplement (PMC3661075; doi:10.1186/2193-1801-2-186), 2013-04-26

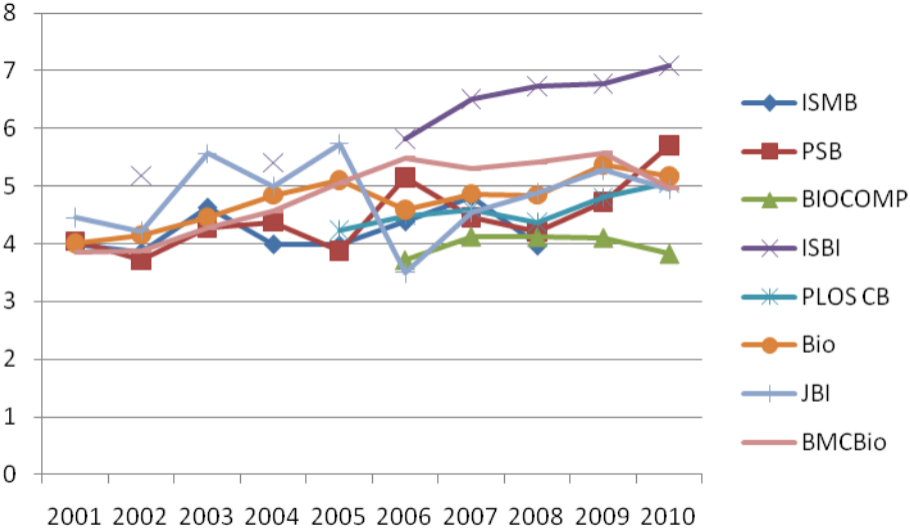

Supplement: 40064_2012_267_MOESM3_ESM.pdf [file 40064_2012_267_MOESM3_ESM.pdf]
